# Supplementary material
Source: MDPI journal article supplement (https://www.mdpi.com/2311-7524/8/4/328)

Table S1: Soil Characterisation

| Parameter    | Unit                               |       |
|--------------|------------------------------------|-------|
| pH           |                                    | 5.9   |
| Total Carbon | mass-%                             | 0.4   |
| Nitrogen     | mg 100 g <sup>-1</sup>             | 3.41  |
| Phosphorous  | mg 100 g <sup>-1</sup>             | <1    |
| Potassium    | mg 100 g <sup>-1</sup>             | 2.2   |
| Calcium      | mg kg <sup>-1</sup>                | 1150  |
| Magnesium    | mg 100 g <sup>-1</sup>             | 12.7  |
| Iron         | g kg <sup>-1</sup>                 | 305   |
| Aluminum     | g kg <sup>-1</sup>                 | 153   |
| CEC          | cmol <sup>+</sup> kg <sup>-1</sup> | 6.4   |
| WHC          | %                                  | 68.95 |

**Tab. S1:** Analytical parameters of the relict Oxisol

Table S2: Biochar Characterisation

| Parameter                 | Unit                | Fresh Biochar | Dried Biochar |
|---------------------------|---------------------|---------------|---------------|
| Density                   | g cm <sup>-3</sup>  | -             | 1.5           |
| Specific surface (BET)    | m <sup>2</sup> g    | -             | 179           |
| Ash 550 °C                | mass-%              | 6.7           | 8             |
| Hydrogen                  | mass-%              | 0.8           | 1.0           |
| Carbon                    | mass-%              | 71.3          | 85.3          |
| Nitrogen                  | mass-%              | 0.42          | 0.5           |
| Oxygen                    | mass-%              | 6.2           | 7.4           |
| Carbonate CO <sub>2</sub> | mass-%              | 2.8           | 3.4           |
| Organic carbon            | mass-%              | 70.5          | 84.4          |
| H/C org. (molar)          |                     | 0.14          | 0.14          |
| O/C (molar)               |                     | 0.065         | 0.065         |
| pH                        |                     | 10.1          | -             |
| Electric conductivity     | μS cm <sup>-1</sup> | 3000          | -             |
| Salt content              | g kg <sup>-1</sup>  | 8.19          | 9,8           |
| Phosphorous               | mass-%              | -             | 2.3           |
| Magnesium                 | mass-%              | -             | 3.6           |
| Calcium                   | mass-%              | -             | 37.4          |
| Potassium                 | mass-%              | -             | 11.2          |
| Sodium                    | mass-%              | -             | 1.8           |
| Iron                      | mass-%              | -             | 1.8           |
| Silicium                  | mass-%              | -             | 13.1          |
| Sulphur                   | mass-%              | -             | 1.5           |

**Tab. S2:.** Biochar-characterization, following analytical methods of the European Biochar Certificate (EBC, 2020).

Table S3: Mean Aboveground Biomass

| Treatment Legend    |                          |                     |         |                   |                            |
|---------------------|--------------------------|---------------------|---------|-------------------|----------------------------|
| Zero-Control Group  |                          | + Factor: Substrate |         |                   |                            |
|                     |                          | I: Biochar          | II: NPK | III: NPK+ Biochar | IV: NPK+ Fermented Biochar |
| + Factor: Placement | A: Topsoil incorporation | A_I                 | A_II    | A_III             | A_IV                       |
|                     | B: Root-zone Hotspot     | B_I                 | B_II    | B_III             | B_IV                       |
|                     | C: Root-zone Layer       | C_I                 | C_II    | C_III             | C_IV                       |

*A\_II = farmer practice*

|         | Mean aboveground biomass<br>[g dm] | Change relative to Zero-<br>Control [%] | Change relative to farmer<br>practice [%] |
|---------|------------------------------------|-----------------------------------------|-------------------------------------------|
| A_I     | 14.80                              | 0                                       | -13                                       |
| A_II    | 17.00                              | 15                                      | 0                                         |
| A_III   | 20.00                              | 35                                      | 18                                        |
| A_IV    | 19.10                              | 29                                      | 12                                        |
| B_I     | 14.00                              | -5                                      | -18                                       |
| B_II    | 23.60                              | 59                                      | 39                                        |
| B_III   | 25.60                              | 73                                      | 51                                        |
| B_IV    | 20.30                              | 37                                      | 19                                        |
| C_I     | 15.20                              | 3                                       | -11                                       |
| C_II    | 20.80                              | 41                                      | 22                                        |
| C_III   | 26.50                              | 79                                      | 56                                        |
| C_IV    | 24.90                              | 68                                      | 46                                        |
| Control | 14.80                              | 0                                       | -13                                       |

Table S4: Mean Leaf Area

| Treatment Legend    |                             | + Factor: Substrate |            |                      |                               |
|---------------------|-----------------------------|---------------------|------------|----------------------|-------------------------------|
| Zero-Control Group  |                             | I:<br>Biochar       | II:<br>NPK | III:<br>NPK+ Biochar | IV:<br>NPK+ Fermented Biochar |
| + Factor: Placement | A:<br>Topsoil incorporation | A_I                 | A_II       | A_III                | A_IV                          |
|                     | B:<br>Root-zone Hotspot     | B_I                 | B_II       | B_III                | B_IV                          |
|                     | C:<br>Root-zone Layer       | C_I                 | C_II       | C_III                | C_IV                          |

*A\_II = farmer practice*

|         | Mean leaf area [cm <sup>2</sup> ] | Change relative to Zero-Controll [%] | Change relative to farmer practice [%] |
|---------|-----------------------------------|--------------------------------------|----------------------------------------|
| A_I     | 622                               | 43                                   | -19                                    |
| A_II    | 772                               | 77                                   | 0                                      |
| A_III   | 1177                              | 171                                  | 52                                     |
| A_IV    | 978                               | 125                                  | 27                                     |
| B_I     | 454                               | 4                                    | -41                                    |
| B_II    | 1660                              | 282                                  | 115                                    |
| B_III   | 1900                              | 337                                  | 146                                    |
| B_IV    | 1352                              | 211                                  | 75                                     |
| C_I     | 589                               | 35                                   | -24                                    |
| C_II    | 1285                              | 195                                  | 66                                     |
| C_III   | 2485                              | 471                                  | 222                                    |
| C_IV    | 1926                              | 343                                  | 149                                    |
| Control | 435                               | 0                                    | -44                                    |

Table S5: Mean Chlorophyll Content Index

| Treatment Legend    |                          |                     |         |                   |                            |
|---------------------|--------------------------|---------------------|---------|-------------------|----------------------------|
| Zero-Control Group  |                          | + Factor: Substrate |         |                   |                            |
|                     |                          | I: Biochar          | II: NPK | III: NPK+ Biochar | IV: NPK+ Fermented Biochar |
| + Factor: Placement | A: Topsoil incorporation | A_I                 | A_II    | A_III             | A_IV                       |
|                     | B: Root-zone Hotspot     | B_I                 | B_II    | B_III             | B_IV                       |
|                     | C: Root-zone Layer       | C_I                 | C_II    | C_III             | C_IV                       |

*A\_II = farmer practice*

|         | Mean Chlorophyll Index | Change relative to Zero-Control [%] | Change relative to farmer practice [%] |
|---------|------------------------|-------------------------------------|----------------------------------------|
| A_I     | 8.04                   | 4                                   | -3                                     |
| A_II    | 8.26                   | 7                                   | 0                                      |
| A_III   | 10.7                   | 39                                  | 30                                     |
| A_IV    | 10.4                   | 35                                  | 26                                     |
| B_I     | 7.21                   | -6                                  | -13                                    |
| B_II    | 13                     | 69                                  | 57                                     |
| B_III   | 17                     | 121                                 | 106                                    |
| B_IV    | 11.5                   | 49                                  | 39                                     |
| C_I     | 7.09                   | -8                                  | -14                                    |
| C_II    | 11.4                   | 48                                  | 38                                     |
| C_III   | 19.8                   | 157                                 | 140                                    |
| C_IV    | 15.2                   | 97                                  | 84                                     |
| Control | 7.7                    | 0                                   | -7                                     |

Table S6: Mean Belowground Biomass

| Treatment Legend    |                          |                     |         |                   |                            |
|---------------------|--------------------------|---------------------|---------|-------------------|----------------------------|
| Zero-Control Group  |                          | + Factor: Substrate |         |                   |                            |
|                     |                          | I: Biochar          | II: NPK | III: NPK+ Biochar | IV: NPK+ Fermented Biochar |
| + Factor: Placement | A: Topsoil incorporation | A_I                 | A_II    | A_III             | A_IV                       |
|                     | B: Root-zone Hotspot     | B_I                 | B_II    | B_III             | B_IV                       |
|                     | C: Root-zone Layer       | C_I                 | C_II    | C_III             | C_IV                       |

*A\_II = farmer practice*

|         | Mean belowground biomass [g dw] | Change relative to Zero-Controll [%] | Change relative to farmer practice [%] |
|---------|---------------------------------|--------------------------------------|----------------------------------------|
| A_I     | 6.65                            | -2                                   | -8                                     |
| A_II    | 7.22                            | 6                                    | 0                                      |
| A_III   | 7.51                            | 10                                   | 4                                      |
| A_IV    | 8                               | 17                                   | 11                                     |
| B_I     | 6.41                            | -6                                   | -11                                    |
| B_II    | 9.03                            | 32                                   | 25                                     |
| B_III   | 8.71                            | 28                                   | 21                                     |
| B_IV    | 7.58                            | 11                                   | 5                                      |
| C_I     | 6.78                            | -1                                   | -6                                     |
| C_II    | 7.89                            | 16                                   | 9                                      |
| C_III   | 8.39                            | 23                                   | 16                                     |
| C_IV    | 9.15                            | 34                                   | 27                                     |
| Control | 6.82                            | 0                                    | -6                                     |

Table S7: Mean Foliar Phosphorous Content

| Treatment Legend       |                                | + Factor: Substrate |            |                      |                                     |
|------------------------|--------------------------------|---------------------|------------|----------------------|-------------------------------------|
| Zero-Control Group     |                                | I:<br>Biochar       | II:<br>NPK | III:<br>NPK+ Biochar | IV:<br>NPK+<br>Fermented<br>Biochar |
| + Factor:<br>Placement | A:<br>Topsoil<br>incorporation | A_I                 | A_II       | A_III                | A_IV                                |
|                        | B:<br>Root-zone<br>Hotspot     | B_I                 | B_II       | B_III                | B_IV                                |
|                        | C:<br>Root-zone Layer          | C_I                 | C_II       | C_III                | C_IV                                |

*A\_II = farmer practice*

|         | Mean foliar<br>Phosphorus<br>[mg g <sup>-1</sup> ] | Mean foliar<br>Phosphorus<br>[% of dry matter] | Change relative to<br>Zero-Control [%] | Change relative to<br>farmer practice [%] |
|---------|----------------------------------------------------|------------------------------------------------|----------------------------------------|-------------------------------------------|
| A_I     | 0.712                                              | 0.0712                                         | 6                                      | 12                                        |
| A_II    | 0.633                                              | 0.0633                                         | -6                                     | 0                                         |
| A_III   | 0.717                                              | 0.0717                                         | 7                                      | 13                                        |
| A_IV    | 0.631                                              | 0.0631                                         | -6                                     | 0                                         |
| B_I     | 0.724                                              | 0.0724                                         | 8                                      | 14                                        |
| B_II    | 0.699                                              | 0.0699                                         | 4                                      | 10                                        |
| B_III   | 0.818                                              | 0.0818                                         | 22                                     | 29                                        |
| B_IV    | 0.688                                              | 0.0688                                         | 3                                      | 9                                         |
| C_I     | 0.672                                              | 0.0672                                         | 0                                      | 6                                         |
| C_II    | 0.729                                              | 0.0729                                         | 9                                      | 15                                        |
| C_III   | 0.967                                              | 0.0967                                         | 44                                     | 53                                        |
| C_IV    | 0.84                                               | 0.084                                          | 25                                     | 33                                        |
| Control | 0.671                                              | 0.0671                                         | 0                                      | 6                                         |

Figure S1: Plant Hight Growthcurve

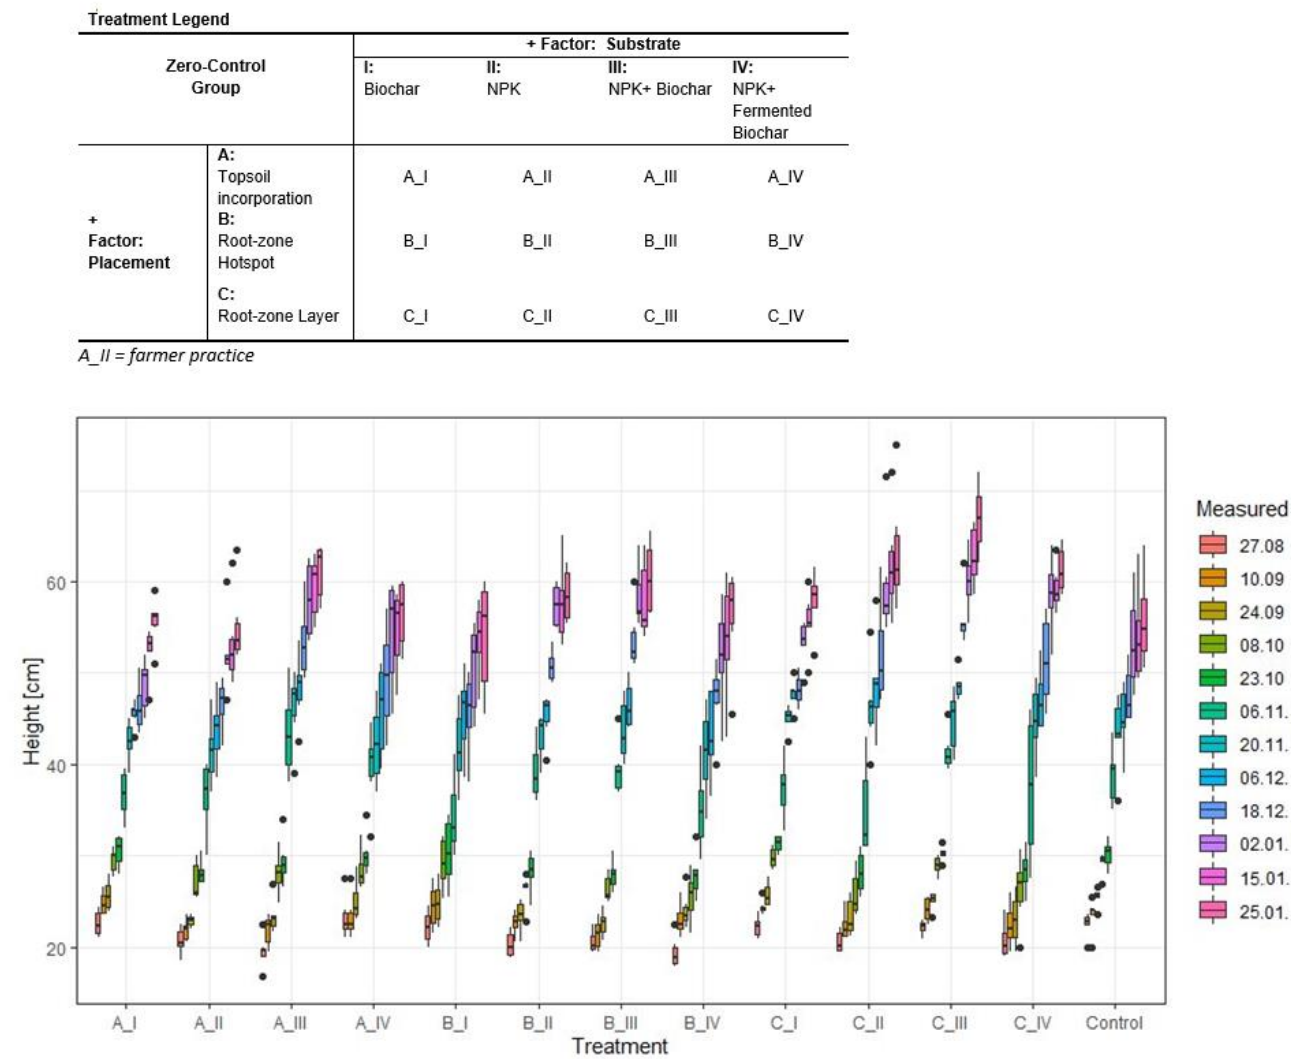



Figure S2: Diameter at Base Development Curve

| Treatment Legend    |                          | + Factor: Substrate |         |                   |                            |
|---------------------|--------------------------|---------------------|---------|-------------------|----------------------------|
| Zero-Control Group  |                          | I: Biochar          | II: NPK | III: NPK+ Biochar | IV: NPK+ Fermented Biochar |
| + Factor: Placement | A: Topsoil incorporation | A_I                 | A_II    | A_III             | A_IV                       |
|                     | B: Root-zone Hotspot     | B_I                 | B_II    | B_III             | B_IV                       |
|                     | C: Root-zone Layer       | C_I                 | C_II    | C_III             | C_IV                       |

A\_II = farmer practice

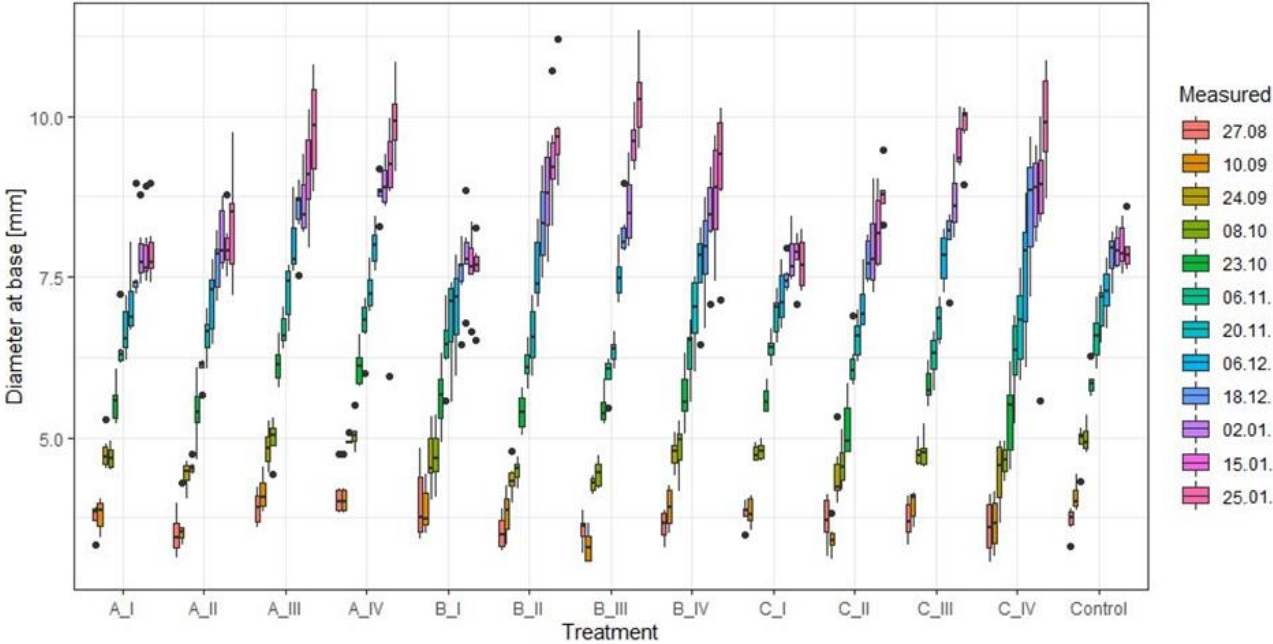

Figure S3: Foliar Nitrogen Content

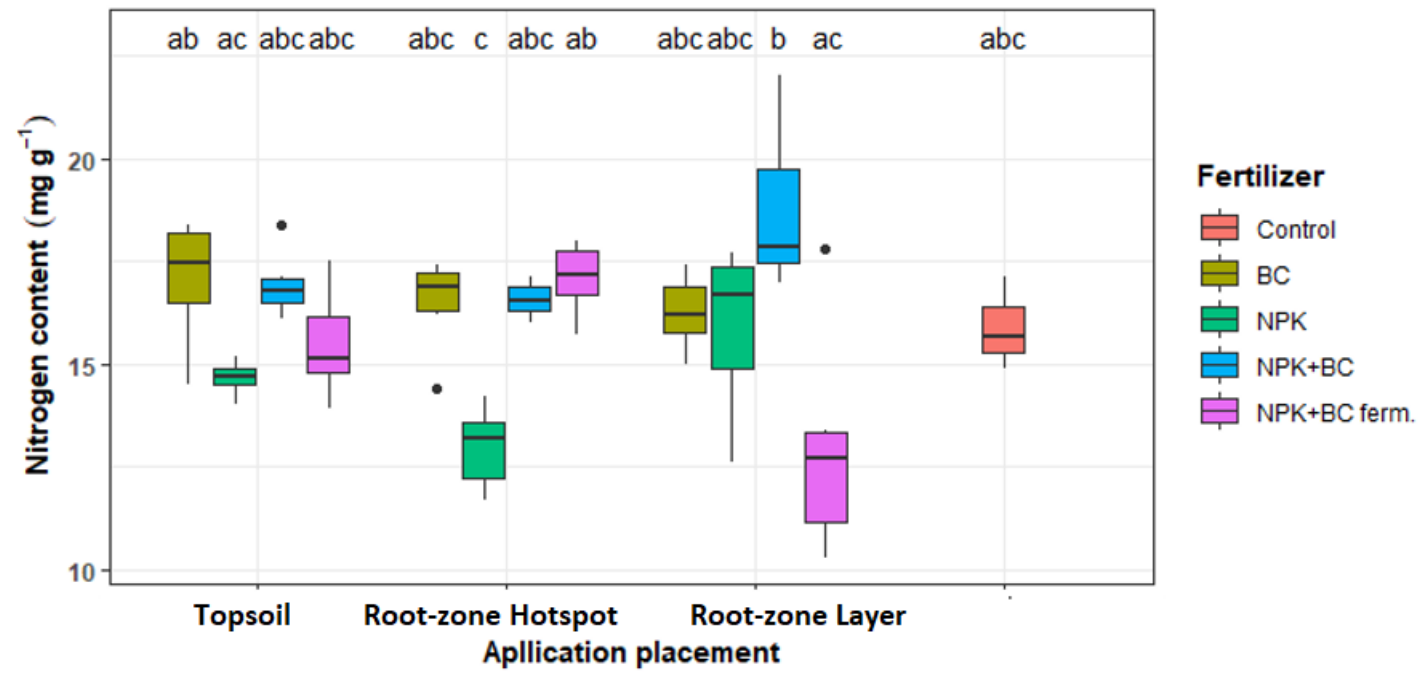

Figure S4: Foliar Potassium Content

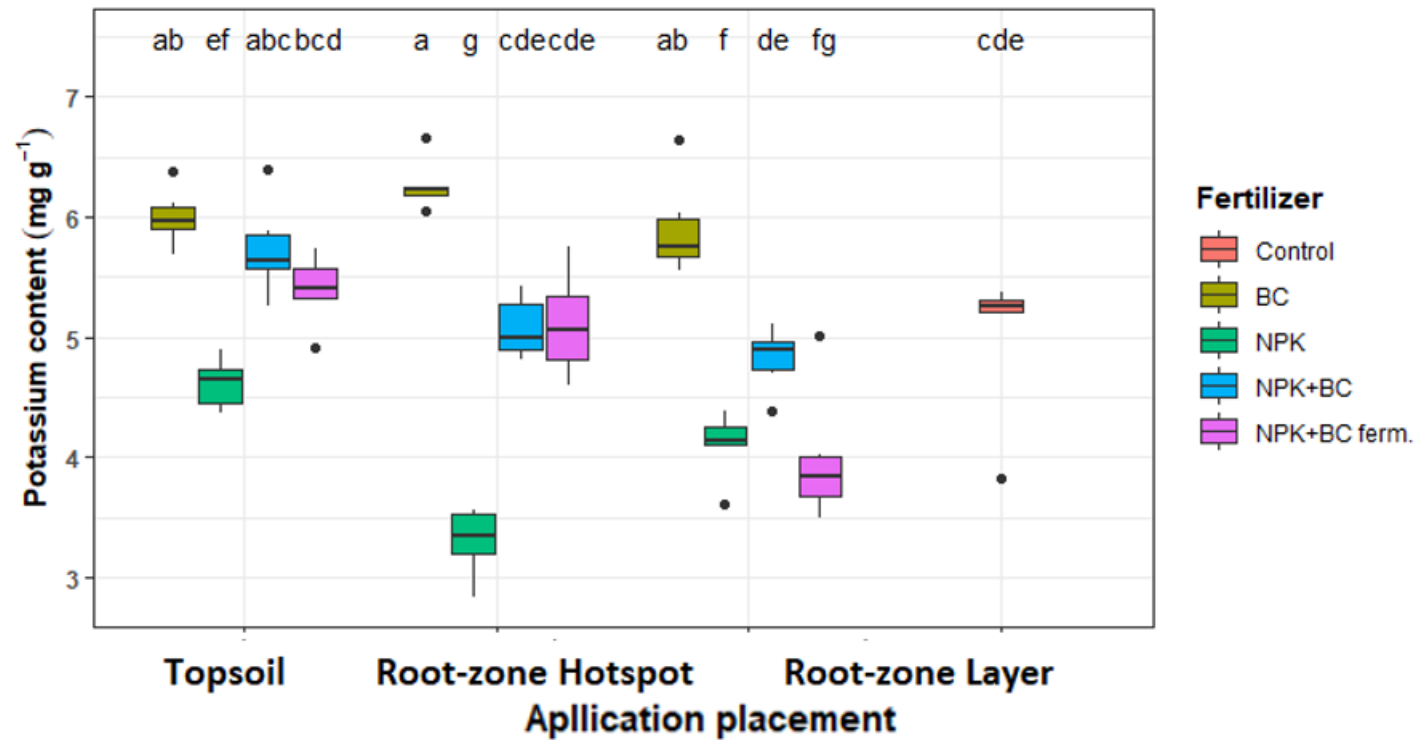

Figure S5: Foliar Calcium, Sulphur, Sodium, Manganese, Iron and Magnesium contents.

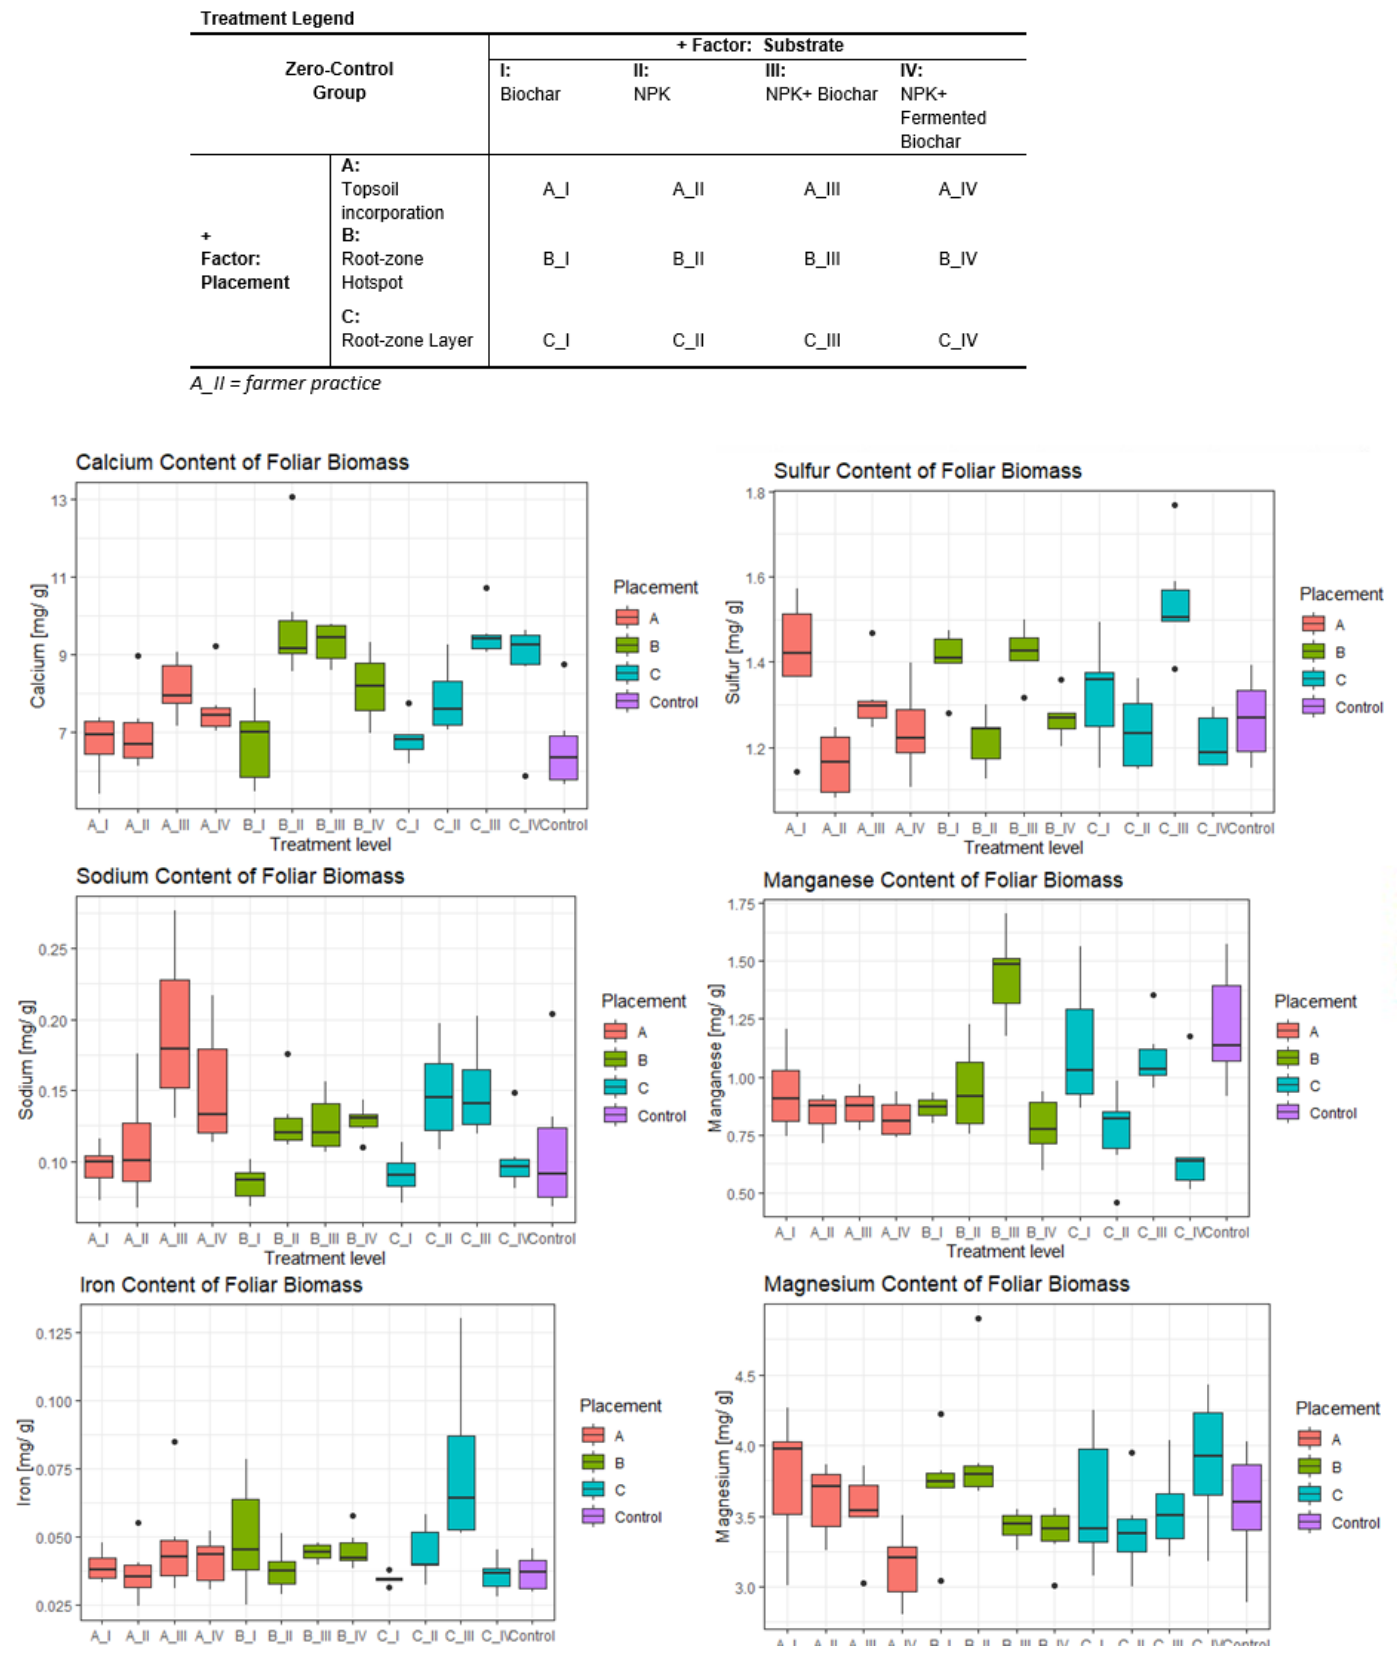

Supplement: s1 [file s1]
